# Supplementary material
Source: PubMed Central journal article supplement (PMC3932758)

## Supplementary Table

**Table 1s.** Sequences of primers used.

| Primer      | Sequence                                |
|-------------|-----------------------------------------|
| mITD-5F     | TGC AGA TGA TCC AGG TGA CT              |
| mITD-3R     | CTC TCG GGA ACT CCC ACT TA              |
| NPM874F     | GGT TCT CTT CCC AAA GTG GAA GC          |
| MRP8R       | GAG GTA TTG ATG ACT TTA TTA TTC TGC AGG |
| NPMexon 1F  | ATG TCT CTT GTC AGC TGT CTT TC          |
| NPM500R     | CAG ATA TAC TTA AGA GTT TCA CAT C       |
| HPRT1       | CCT GCT GGA TTA CAT TAA AGC ACT G       |
| HPRT2       | GTC AAG GGC ATA TCC AAC AAC AAA C       |
| mFLT3-RT-5F | GCT CTG TCT CCC CTT CAT TG              |
| mFLT3-RT-3R | CCA GGA CCT TCC CAA ACT CT              |
| mSTAT5-5F   | AAG TTC ACA GTC CTG TTT GAG TC          |
| mSTAT5-3R   | GGT GGC AGT AGC ATT GTG G               |

## Supplementary Methods

### *Complete peripheral blood cell count and cytology*

Peripheral blood was collected from cardiac incision immediately after the animals were euthanized. CBC was performed on the sample using a Hemavet950 hematology system (Drew Scientific, Oxford, CT).

### *Histopathology and cytology*

Murine tissues were prepared and stained with hematoxylin and eosin solution (H&E) as described previously [1]. Images were captured at room temperature with a Zeiss Axioskop upright microscope with Achromplan 5×/0.16 NA, 10×/0.3 NA, and

40×/0.6 NA objectives and were photographed with an AxioCam camera (Zeiss) and Axiovision 4.0 software (Zeiss Peabody, MA)).

### *Immunofluorescence*

For immunofluorescence, BM cytopins were prepared then fixed in 4% paraformaldehyde. Alexa Fluor350 conjugated wheat germ agglutinin (WGA) (Molecular Probes/Invitrogen, Carlsbad, CA) was used to stain the cell membrane, 4',6-diamidino-2-phenylindole (DAPI) to stain the nucleus and polyclonal anti-Flag antibody produced in rabbit (Sigma) to bind the Flag-tagged NPM protein. Alexa Fluor 488 conjugated anti-rabbit secondary antibody was used to detect the Flag-tagged NPM protein. Immunofluorescent images were acquired at room temperature on a Nikon ECLIPSE-Ti inverted microscope (Nikon Instruments, Melville, NY) with Hoffman Modulations Contrast (HMC) 40x ELWD Plan Fluoro/0.60 na objective and HMC Model G1 0.5 na, 55mm WD condenser (Modulations Optics Inc., Rochester, NY). Fluorescent images were captured with Nikon Digital Sight DS-Qi1 digital microscope camera (Nikon instruments). The images were collected and converted to JPEG format using NIS-Elements AR 3.0 software (Nikon Instruments).

### *Immunohistochemistry*

For immunohistochemistry, a monoclonal NPM antibody conjugated to APAAP complex (clone 376, M7305, Dako, Glostrup, Denmark) was used. Images were captured at room temperature with a Zeiss Axioskop upright microscope with

Achroplan 5×/0.16 NA, 10×/0.3 NA, and 40×/0.6 NA objectives and were photographed with an AxioCam camera (Zeiss) and Axiovision 4.0 software (Zeiss Peabody, MA)).

### **Supplementary Reference:**

1. Baldwin BR, Li L, Tse KF, Small S, Collector M, Whartenby KA, Sharkis SJ, Racke F, Huso D, Small D. Transgenic mice expressing tel-FLT3, a constitutively activated form of FLT3, develop myeloproliferative disease. *Leukemia*. 2007 Apr;21(4):764-71.

### **Supplementary Figure Legends**

**Figure 1s: Histopathologic images of leukemic mice BM, peripheral blood (PB), spleens and other infiltrated organs compared to wt.** H&E staining of BM cytopspins (i-iii), PB smears (iv-vi), spleen (vii-ix), kidney (x-xi), and meninges (xii-xiii) of a representative wt mouse (column 1), a representative mouse with T cell ALL (column 2) and a representative mouse with AML (column 3). Bar scale (i-vi = 10µM; vii, x = 50µM; viii, ix, xi,xiii=100µM).

**Figure 2s: A subset of mice with both mutations develop a T cell ALL characterized by CD3<sup>+</sup>/CD8<sup>+</sup>/CD4<sup>-</sup> lymphoblasts.** Flow cytometry plots demonstrating the characteristic phenotype of a wild-type mouse (first row) compared to a mouse with T cell ALL with CD3<sup>+</sup>/CD8<sup>+</sup>/CD4<sup>-</sup> lymphoblasts (second row) infiltrating the bone marrow and thymus.

**Figure 3s: Flag-NPMc+ and Flt3/ITD are expressed in leukemia cells and NPMc+ localizes to the cytoplasm.** A) RT-PCR of RNA extracted from BM cells of leukemic mice and a wild-type mouse. Lane 2 demonstrates a mouse with loss of heterozygosity of the wild-type *Flt3* allele and therefore lacks the smaller, wild-type *Flt3* band. B) Detection of Flt3/ITD and NPMc+ transcript in other infiltrated organs by RT-PCR. C) Quantitative RT-PCR performed on whole bone marrow isolated from 2-month-old mice demonstrates the expected increase in HoxA9 and HoxA10 attributable to NPMc+ expression. Assays done in triplicate, error bars represent standard deviation. D) IF was performed using Dapi nuclear stain (blue), polyclonal anti-Flag antibody with AF488 (green) secondary antibody. BM cytopins from transgenic Flag-NPMwt mice (row 1). Aggregates of Flag-NPMwt are visible in the nuclei of the BM cells. IF of BM cytopins from leukemic ITD/NPMc+ mice (rows 2 and 3) in which the Flag-NPMc+ signal localizes to the cytoplasm with no aggregates visualized in the nuclei. (left 3 columns at high power, far right column at low power) E) Immunohistochemistry staining of NPM in NPMwt cells and NPMc+ cells showing aberrant expression of NPM in the cytoplasm only in murine cells with NPMc+ (arrows).

**Figure 4s: NPMc+ is aberrantly expressed in T cells of NPMc+ transgenic mice.** RT-PCR performed on T cells isolated via magnetic-bead separation from the spleens of 2-month-old mice of each genotype. Flag-NPMc+ expression is seen in mice the T cells of NPMc+ mice and ITD/NPMc+ mice.

**Figure 5s: Trend towards expansion of myelomonocytic lineage in the peripheral blood of mice with ITD, NPMc+ and both mutations prior to overt disease development.** Box and whisker plots showing number of peripheral blood monocytes and neutrophils in wild-type (wt, N=3), mice with Flt3/ITD alone (ITD, N=6), mice with NPMc+ (N=6) alone, and mice with both mutations (NPMc+/ITD, N=9).

Supplementary Figures:

Figure 1s

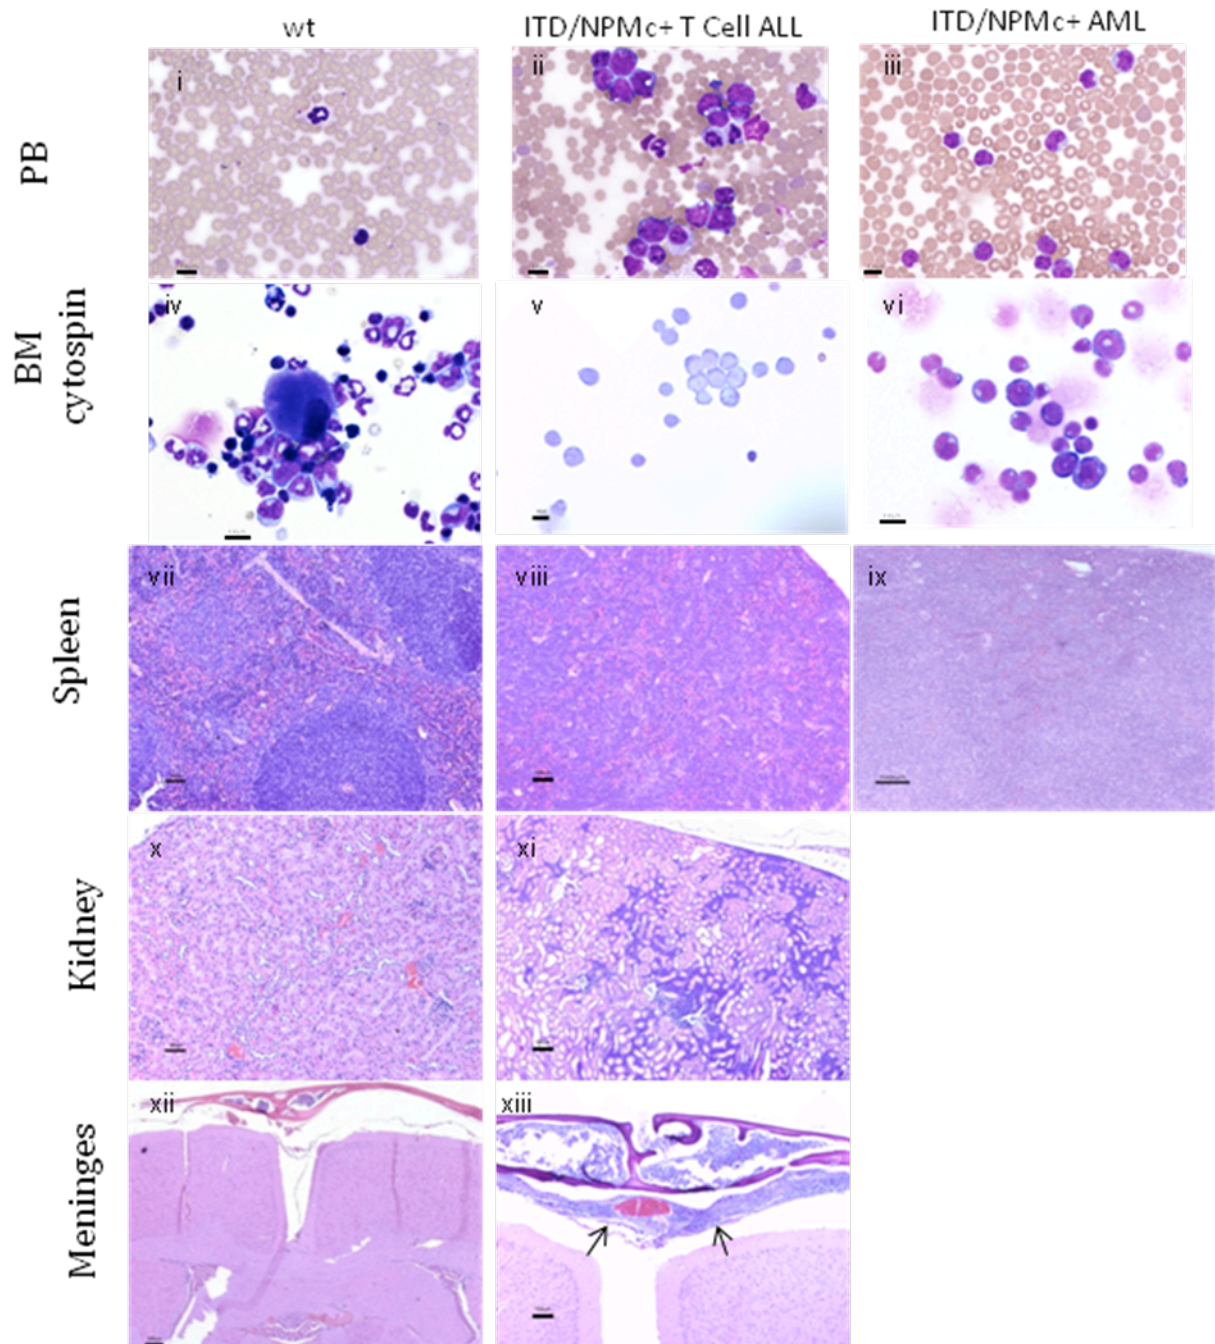

**Figure 2s**

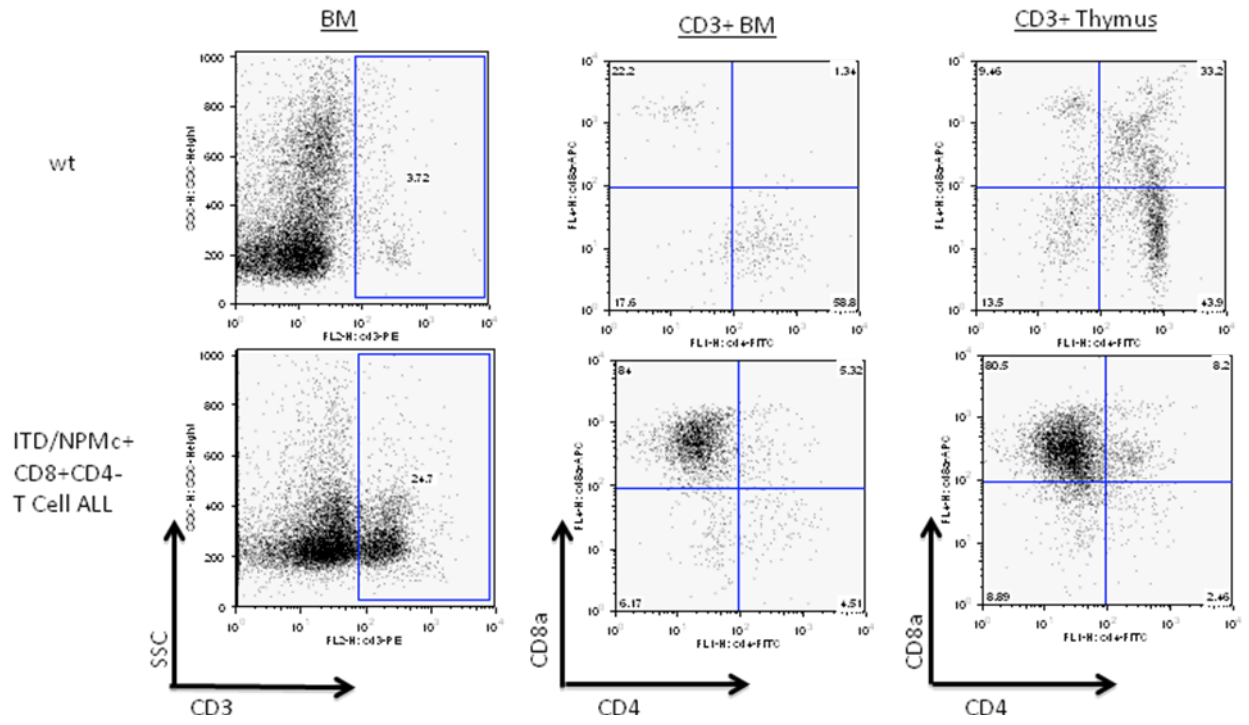

**Figure 3s**

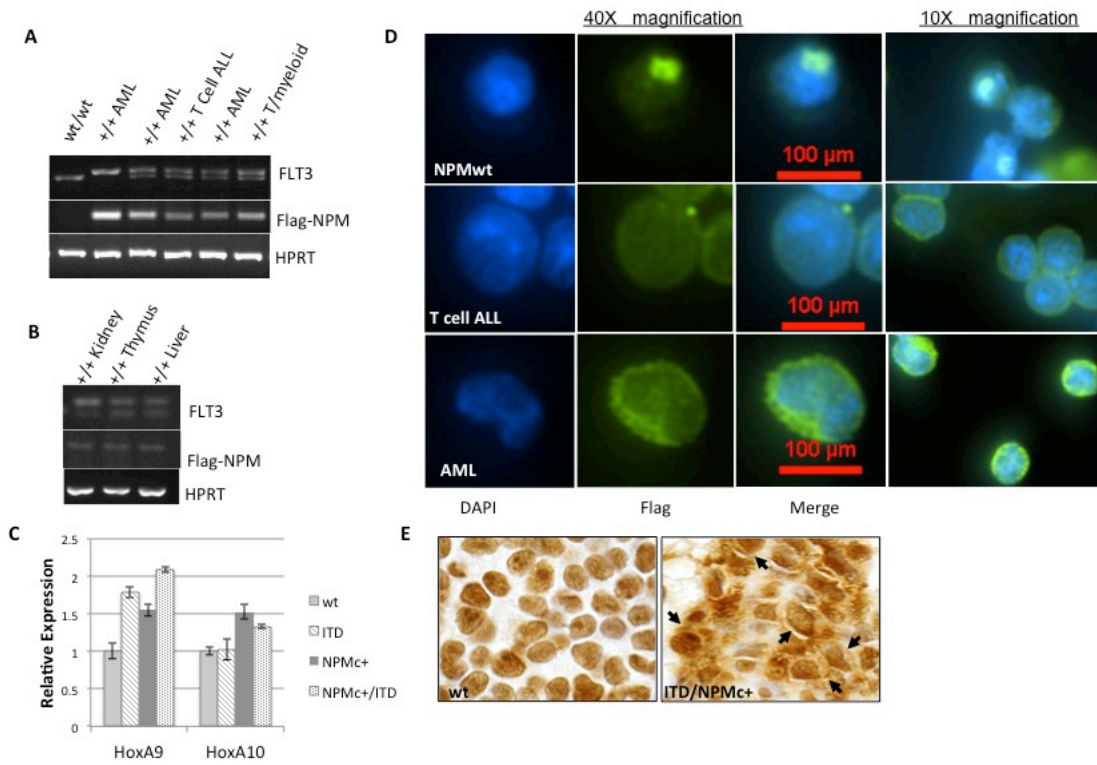

Figure 4s

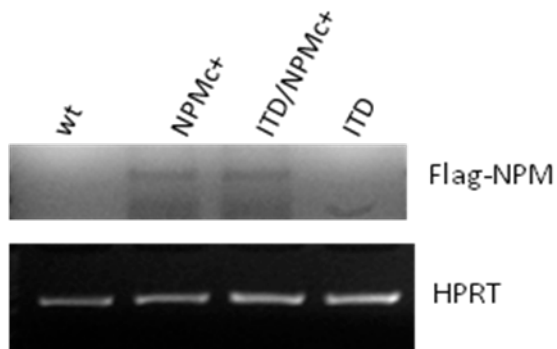

Figure 5s

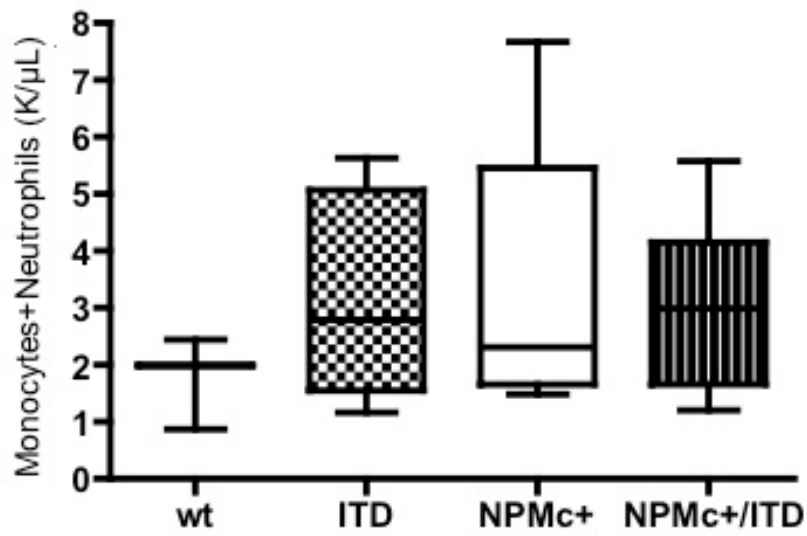

Supplement: NIHMS537271-supplement-new_supp_data.pdf [file NIHMS537271-supplement-new_supp_data.pdf]
